# Supplementary material for: Imidazole/benzimidazole-modified cyclotriphosphazenes as highly selective fluorescent probes for Cu2+: synthesis, configurational isomers, and crystal structures
Source: Royal Society of Chemistry journal article supplement (doi:10.1039/c7dt01134b), 2017-01-01
Supplement: c7dt01134b1.pdf [file c7dt01134b1.pdf]

## SUPPORTING INFORMATION

### **Imidazole/Benzimidazole-Modified Cyclotriphosphazenes as Highly Selective Fluorescent Probes for Cu<sup>2+</sup>: Synthesis, Configurational Isomers, and Crystal Structures**

Aylin Uslu\*, Süreyya Oğuz Tümay, Ahmet Şenocak, Fatma Yuksel, Elif Özcan, Serkan Yeşilot\*

Department of Chemistry, Gebze Technical University, Gebze 41400, Kocaeli, Turkey

\* Corresponding authors. Tel.: +90 262 6053009 and +90 262 6053014

E-mail addresses: [aylin@gtu.edu.tr](mailto:aylin@gtu.edu.tr) and [yesil@gtu.edu.tr](mailto:yesil@gtu.edu.tr)

## Compound 2a

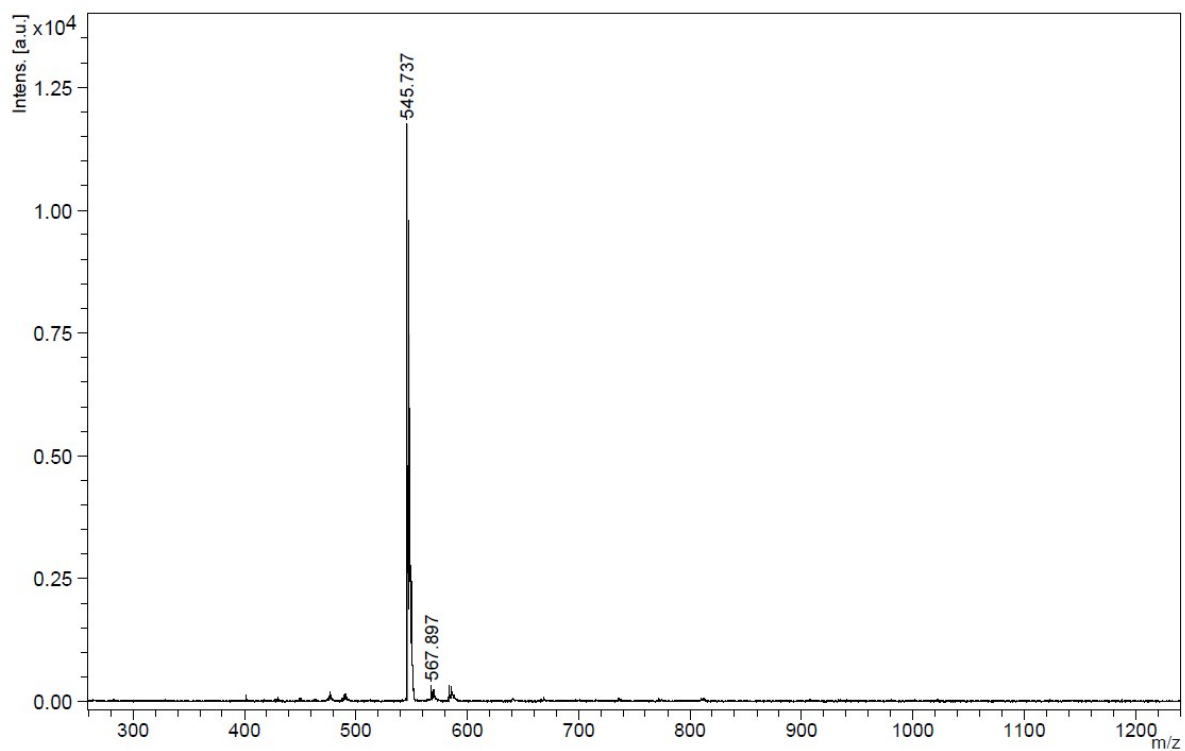

**Figure S1.** MALDI-TOF mass spectrum of compound **2a**

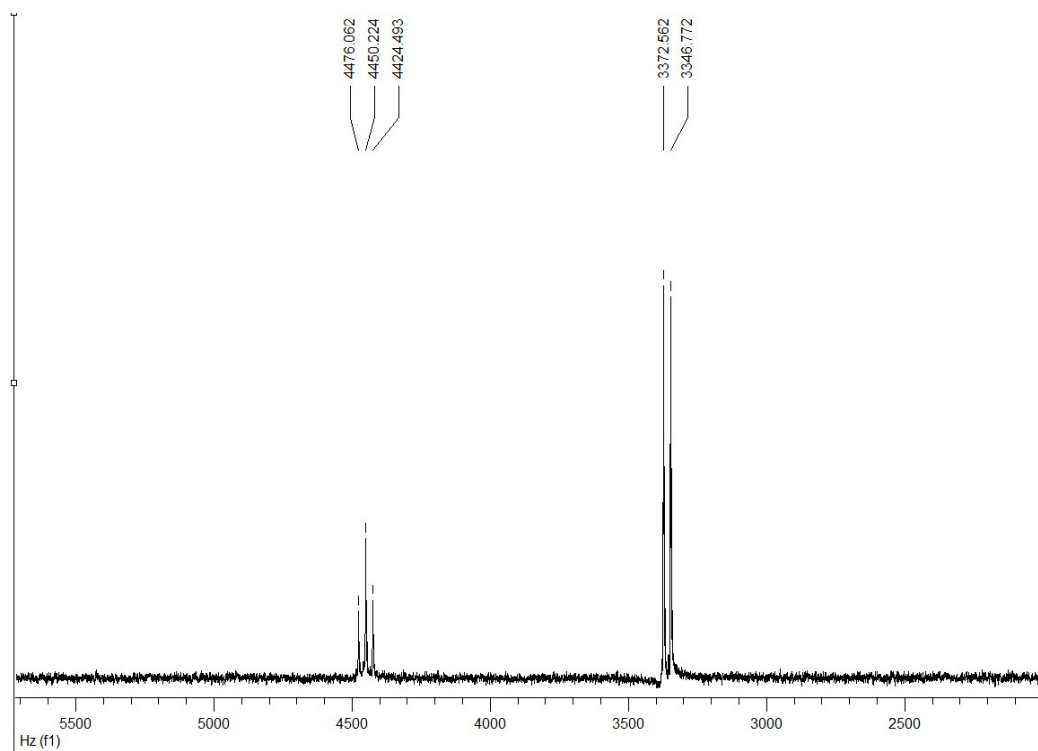

**Figure S2.** The proton decoupled  $^{31}\text{P}$  NMR spectra of compound **2a** in  $\text{CDCl}_3$

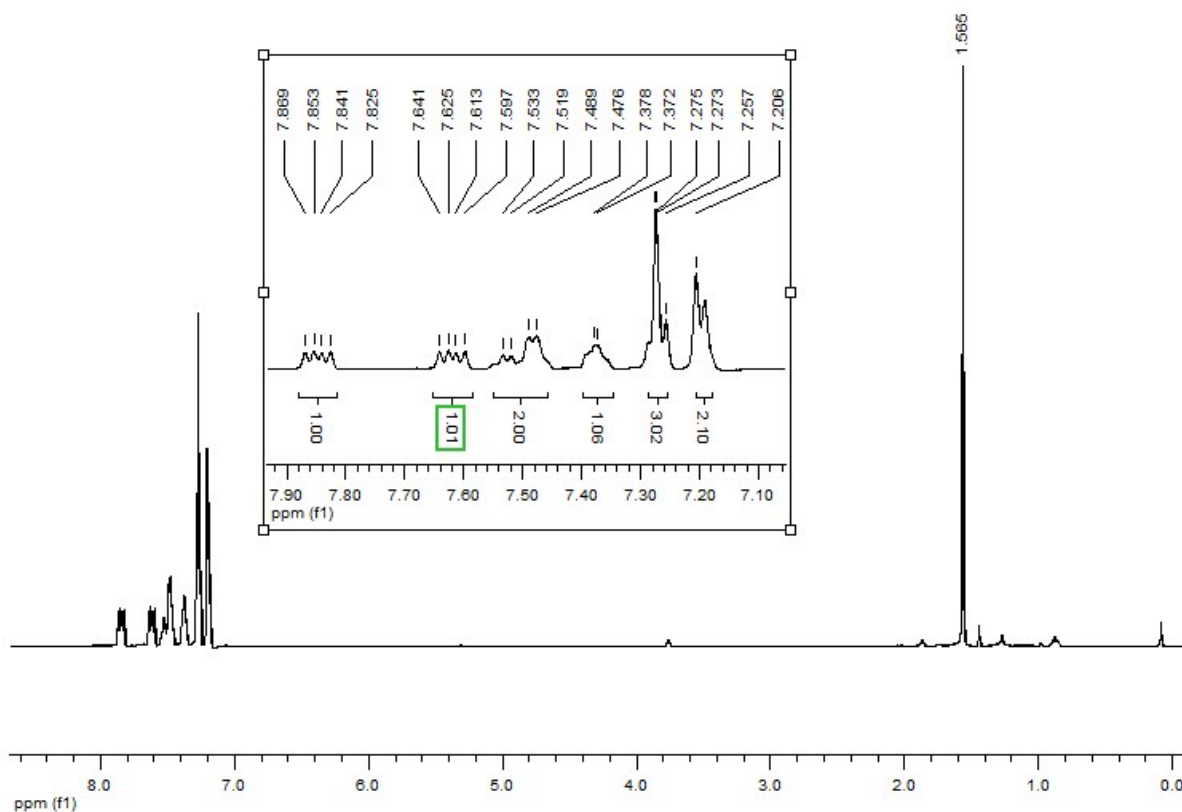

**Figure S3.** The  $^1\text{H}$  NMR spectra of compound **2a** in  $\text{CDCl}_3$  (1.56 ppm  $\text{H}_2\text{O}$  solvent peak, 7.27 ppm  $\text{CDCl}_3$  solvent peak)

### Compound 3a

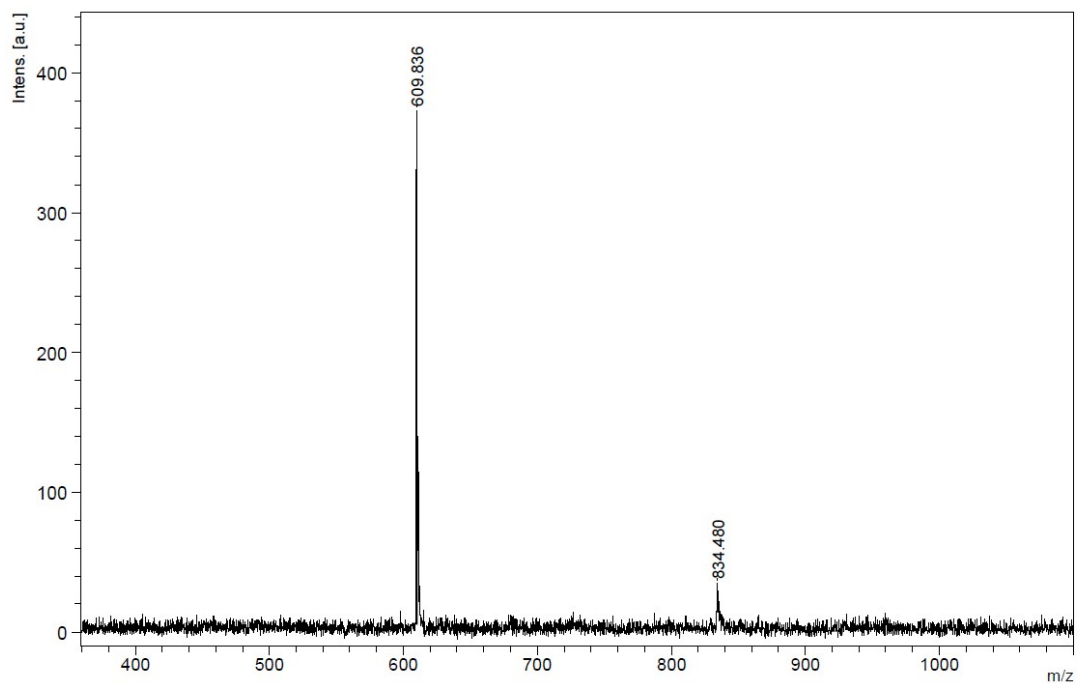

**Figure S4.** MALDI-TOF mass spectrum of compound **3a**

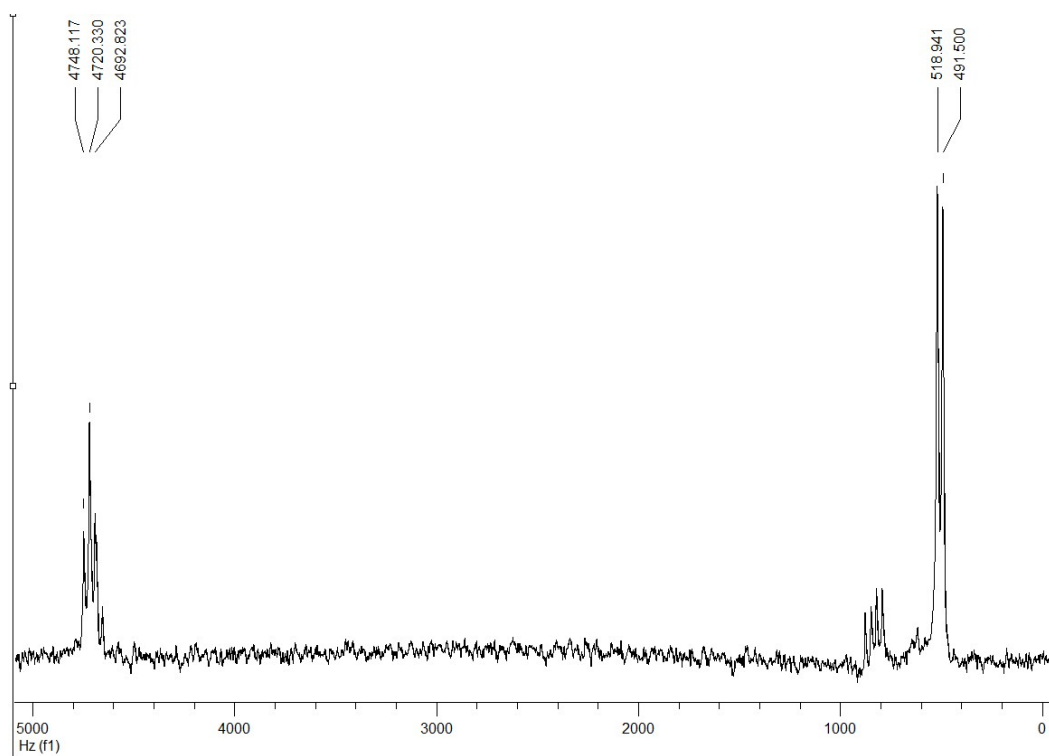

**Figure S5.** The proton decoupled  $^{31}\text{P}$  NMR spectra of compound **3a** in  $\text{CDCl}_3$

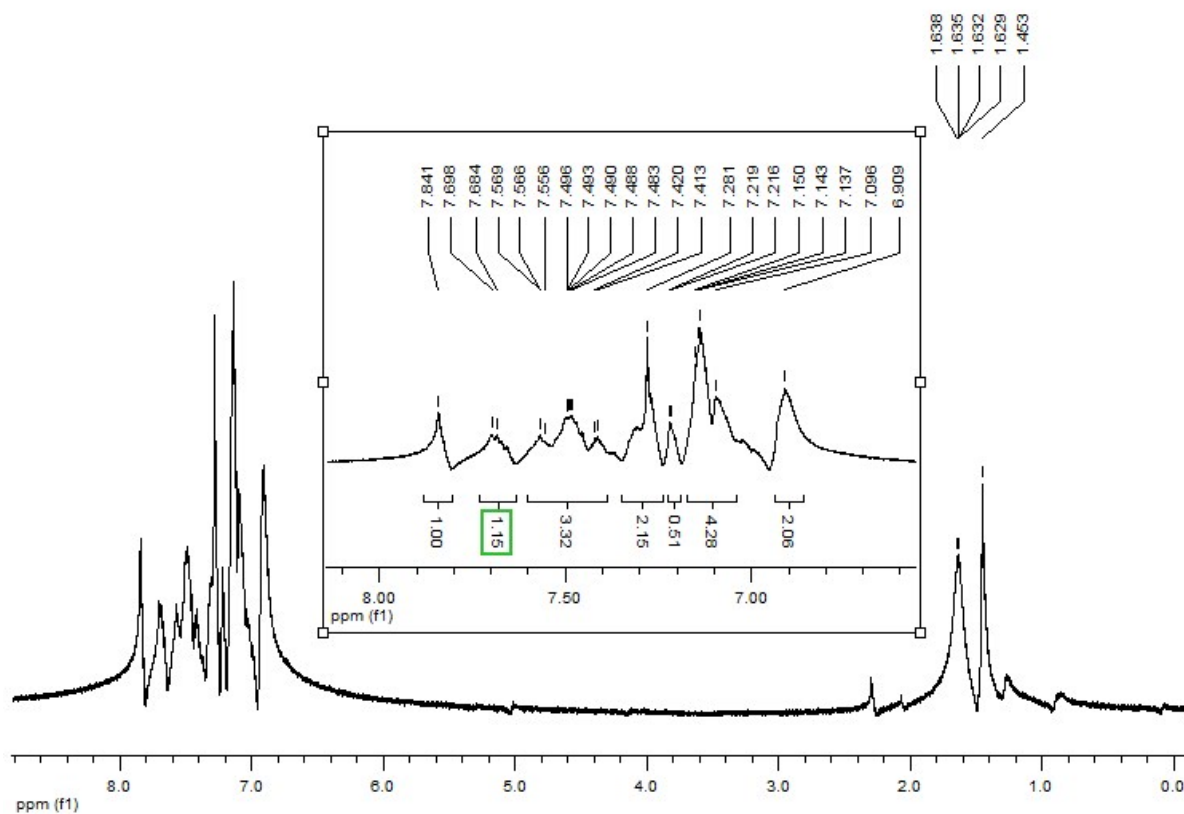

**Figure S6.** The  $^1\text{H}$  NMR spectra of compound **3a** in  $\text{CDCl}_3$

## Compound 3b

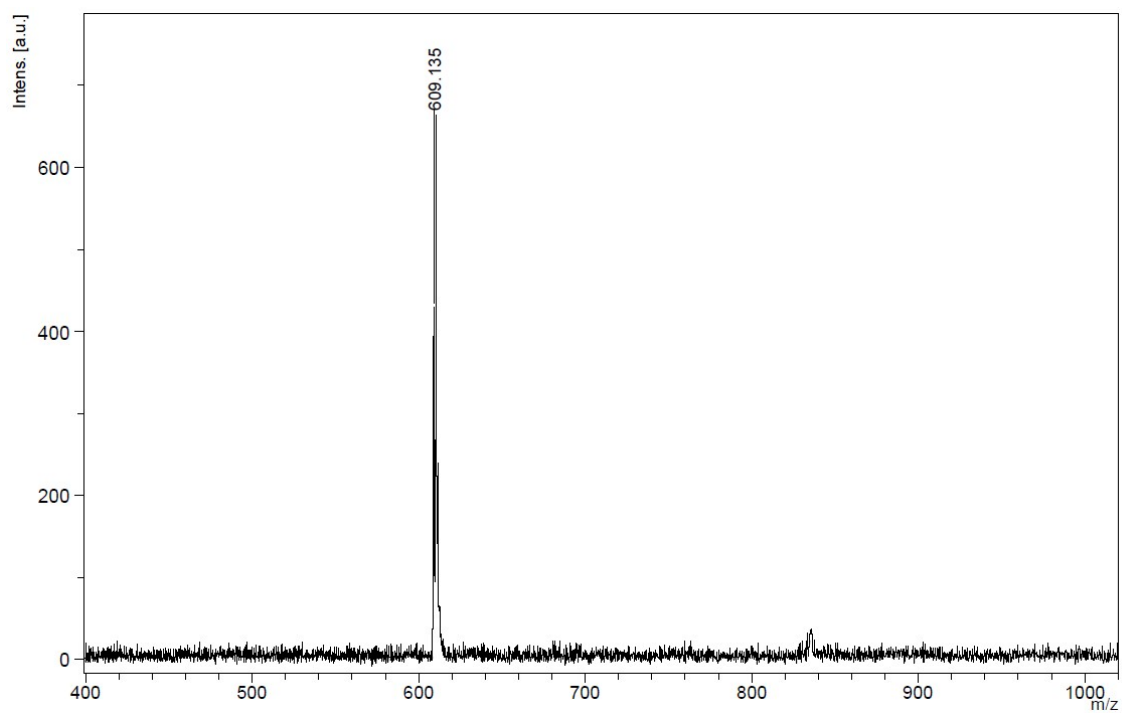

**Figure S7.** MALDI-TOF mass spectrum of compound **3b**

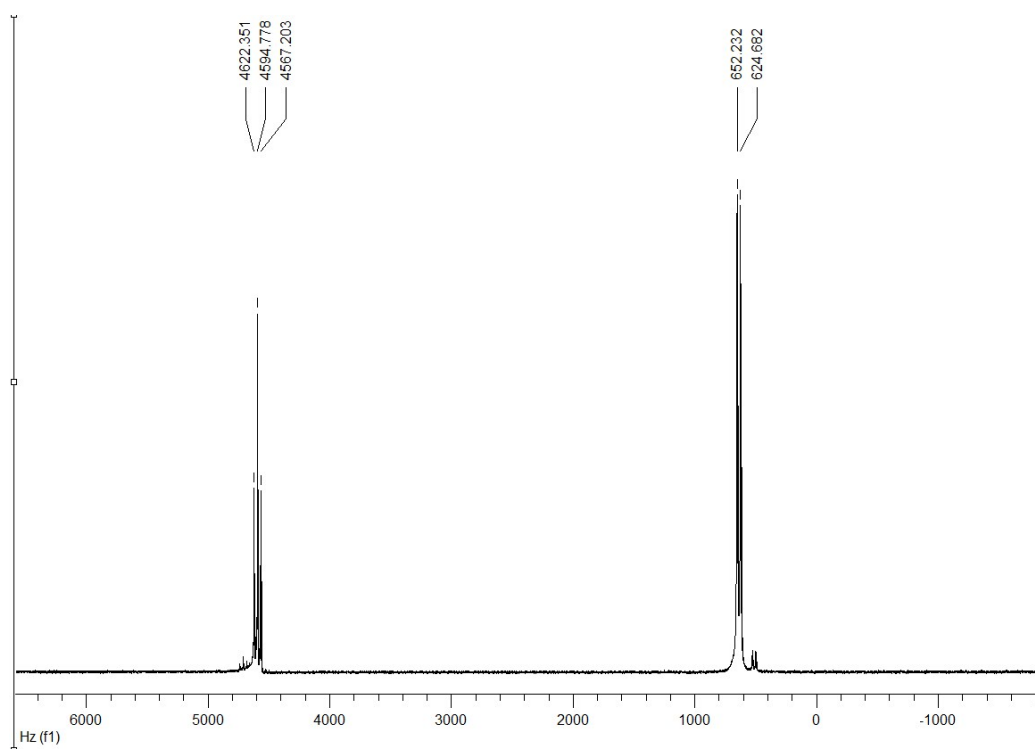

**Figure S8.** The proton decoupled  $^{31}\text{P}$  NMR spectra of compound **3b** in  $\text{CDCl}_3$

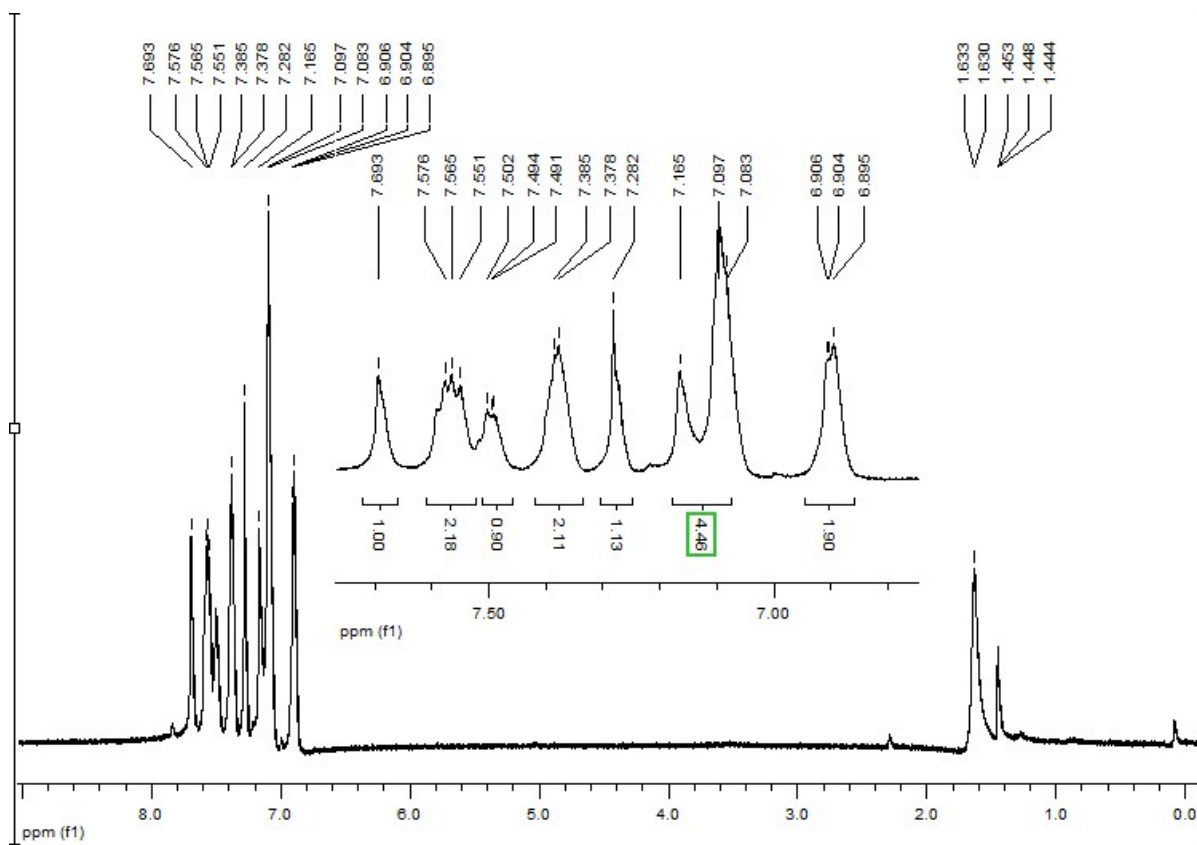

**Figure S9.** The  $^1\text{H}$  NMR spectra of compound **3b** in  $\text{CDCl}_3$

### **Compound 4a**

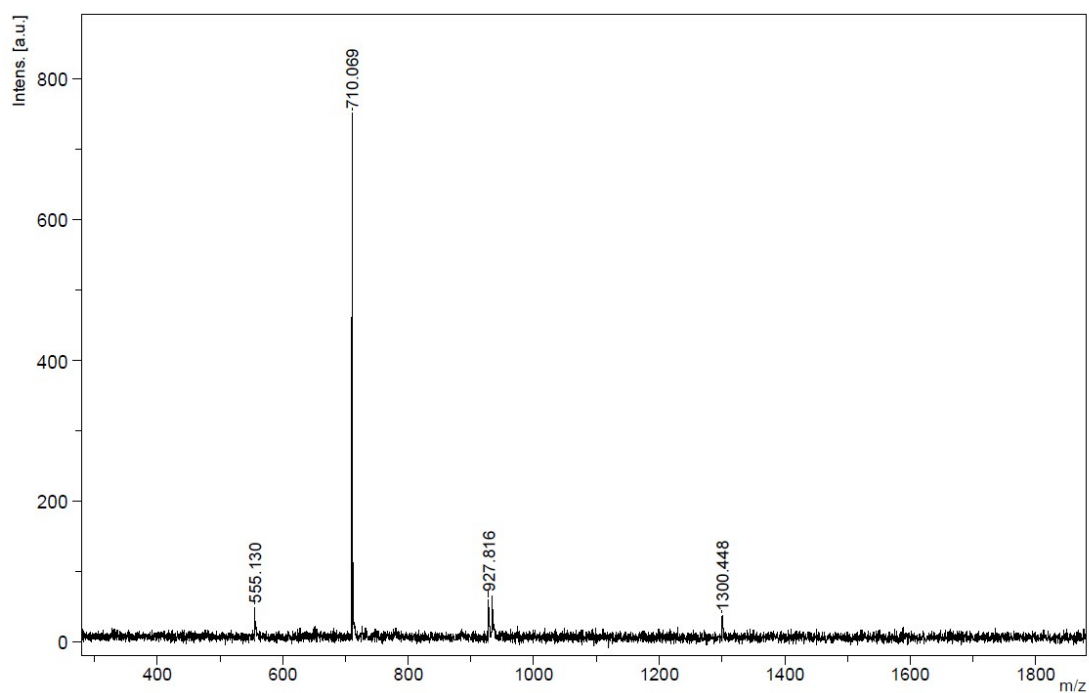

**Figure S10.** MALDI-TOF mass spectrum of compound **4a**

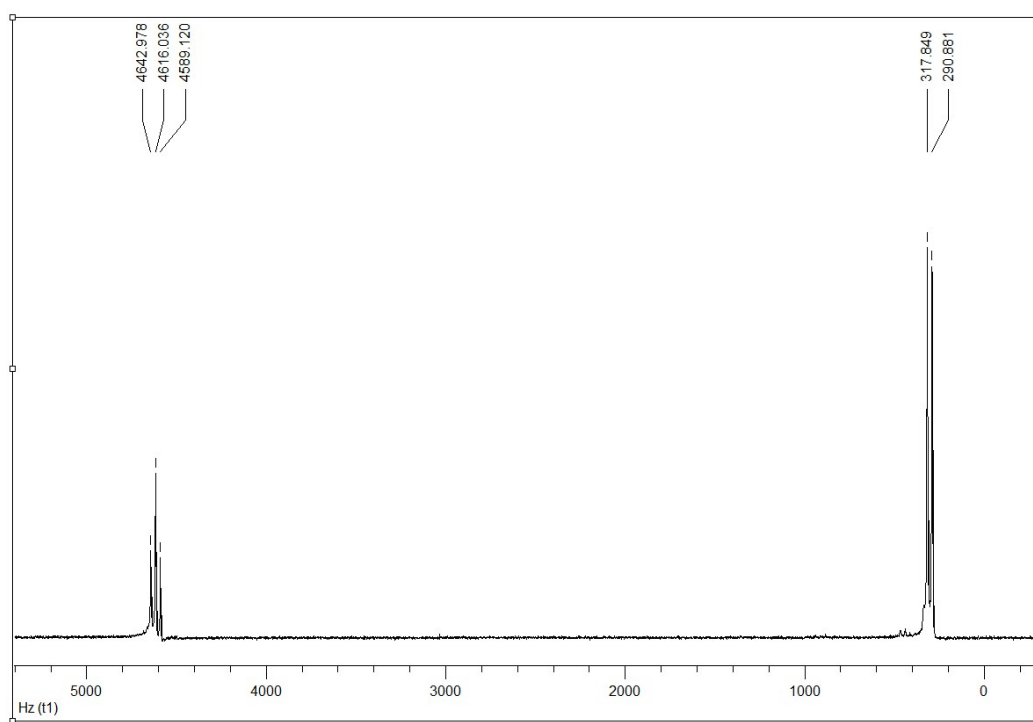

**Figure S11.** The proton decoupled  $^{31}\text{P}$  NMR spectra of compound **4a** in  $\text{CDCl}_3$

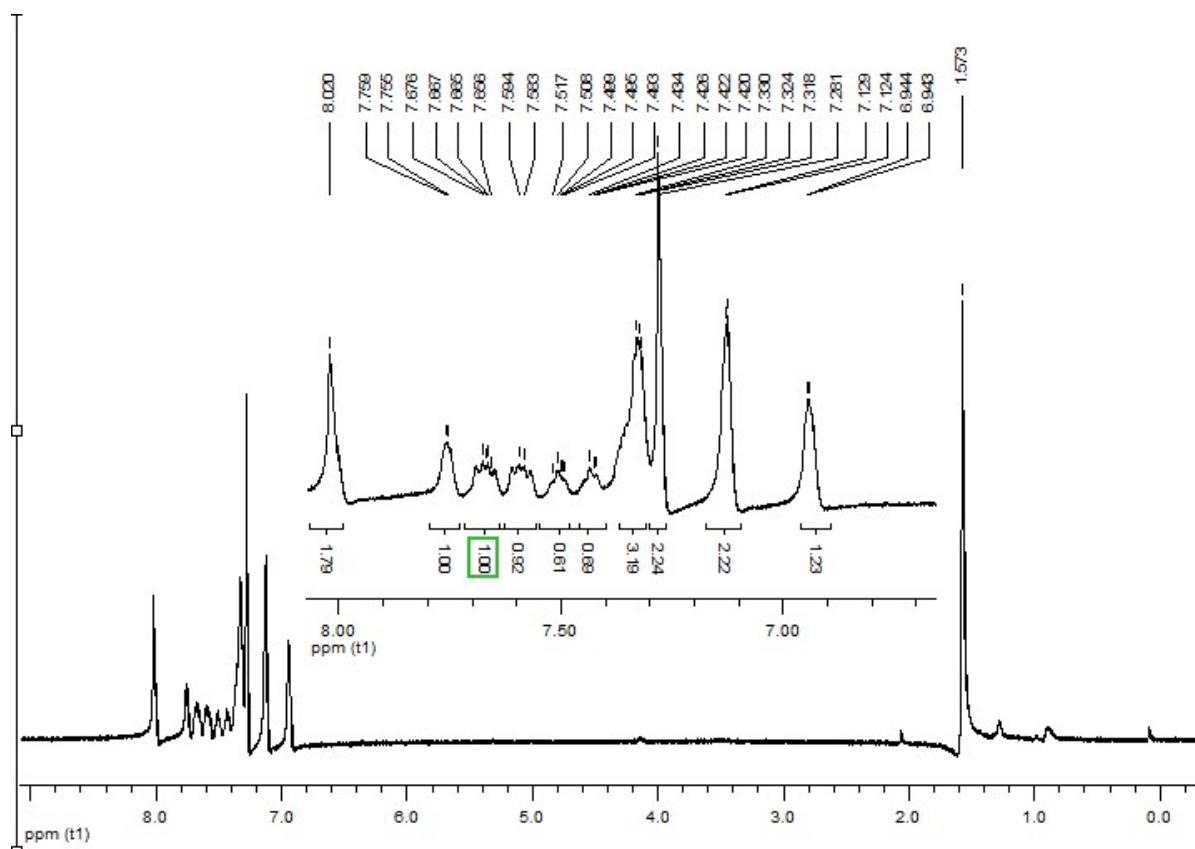

**Figure S12.** The  $^1\text{H}$  NMR spectra of compound **4a** in  $\text{CDCl}_3$

## Compound 4b

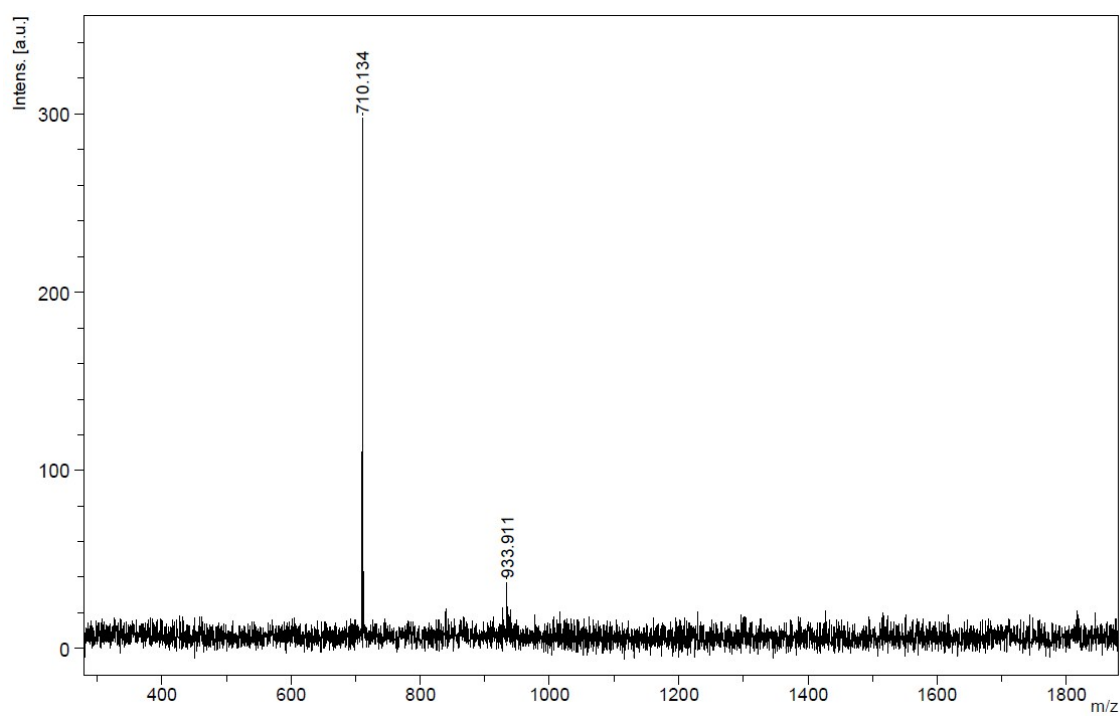

**Figure S13.** MALDI-TOF mass spectrum of compound **4b**

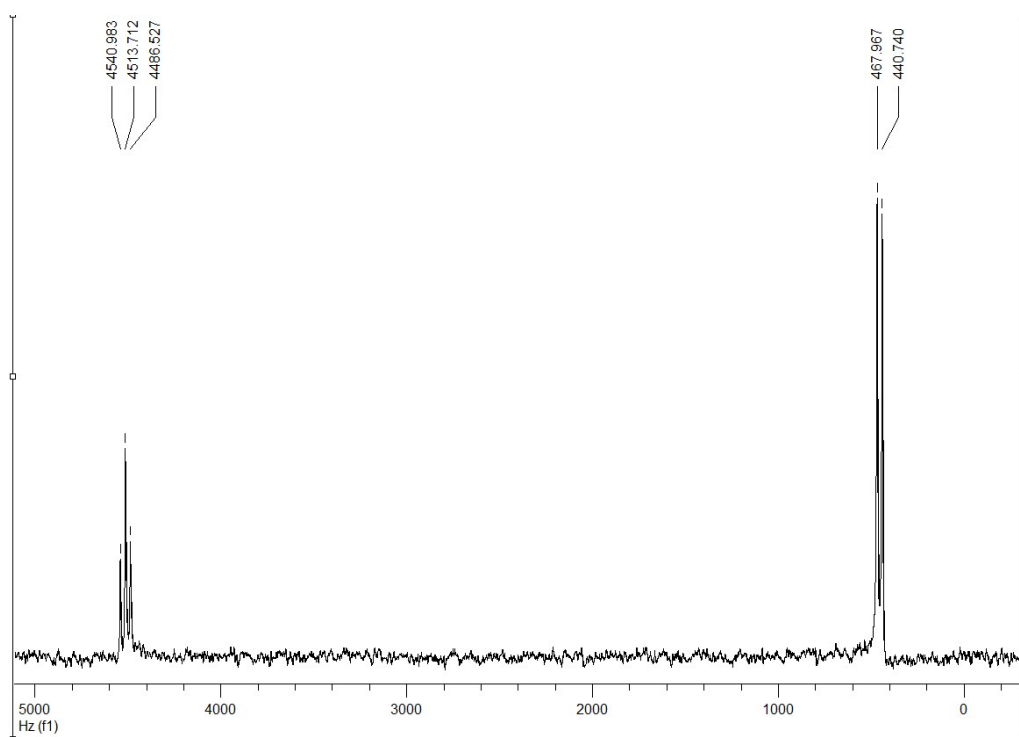



**Figure S14.** The proton decoupled  $^{31}\text{P}$  NMR spectra of compound **4b** in  $\text{CDCl}_3$

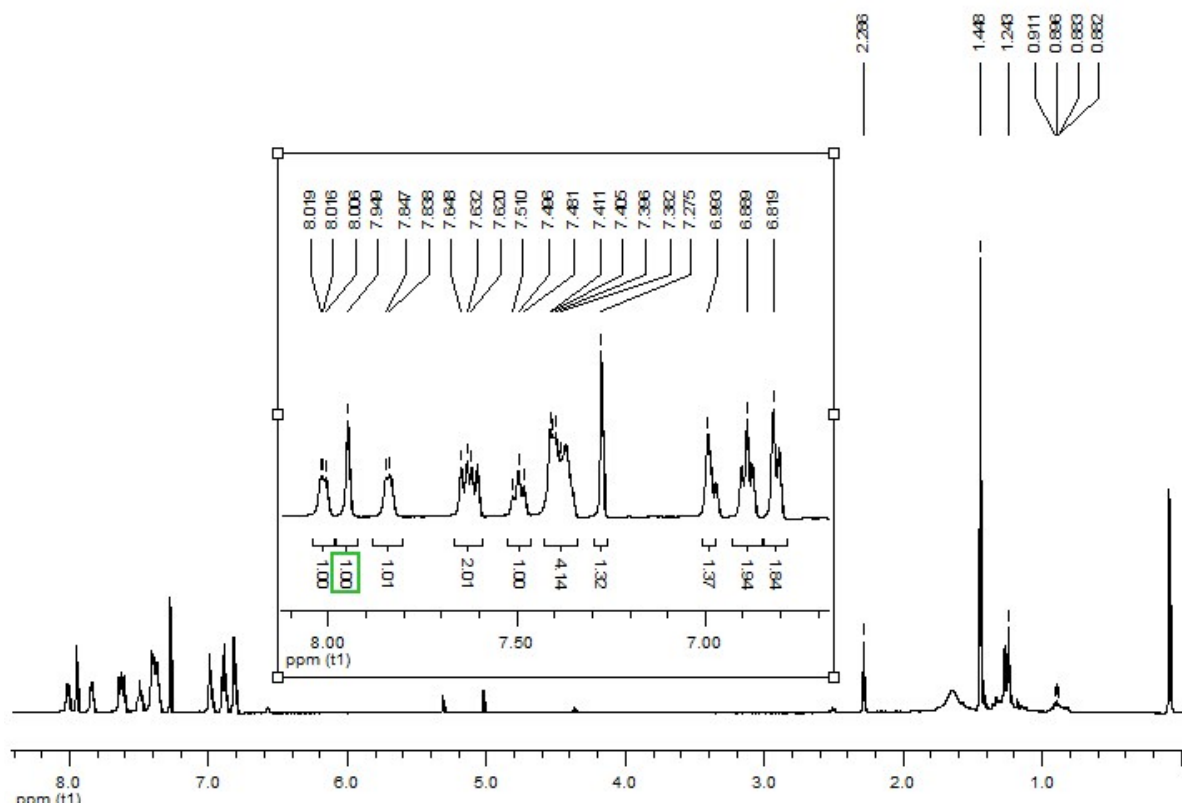

**Figure S15.** The  $^1\text{H}$  NMR spectra of compound **4b** in  $\text{CDCl}_3$

## Crystal Structure Analysis

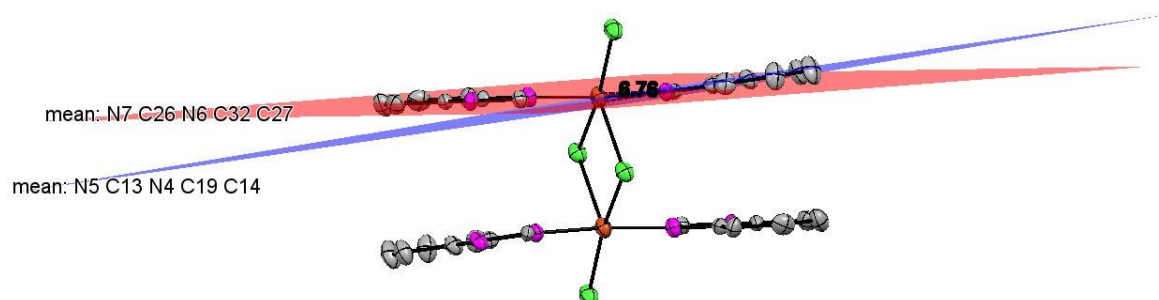

**Fig S16.** The orientation of imidazole rings in compound **5** (Viewing only complex moiety)

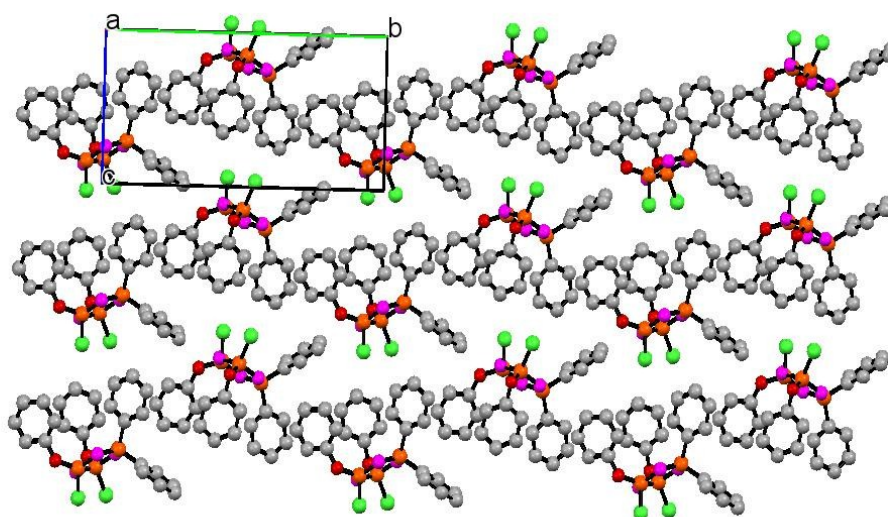

**Fig. S17** View of crystal packing of compound **2a**.

**Table S1.** Selected inter-molecular interactions for compound **2a**

| D-H...A                             | D-H  | H...A | D...A    | DHA | Symmetry code  |
|-------------------------------------|------|-------|----------|-----|----------------|
| C8-H8...N3 (intra)                  | 0.95 | 2.62  | 3.028(4) | 106 |                |
| C9-H9...N2                          | 0.95 | 2.50  | 3.413(5) | 161 | 1-x,1/2+y,-z   |
| C4-H4...Cg3 <sup>1</sup>            | 0.95 | 2.77  | 3.648(4) | 154 | x,y,1+z        |
| C6-H6...Cg5 <sup>2</sup>            | 0.95 | 2.89  | 3.679(3) | 141 | x,y,z          |
| C14-H14...Cg5 <sup>2</sup>          | 0.95 | 2.74  | 3.444(3) | 132 | 1+x,y,z        |
| C4-H4...Cg2 <sup>3</sup>            | 0.95 | 2.73  | 3.490(4) | 137 | 1-x,-1/2+y,1-z |
| <sup>1</sup> Cg3:C7C8C9C10C11C12    |      |       |          |     |                |
| <sup>2</sup> Cg5:C19C20C21C22C23C24 |      |       |          |     |                |
| <sup>3</sup> Cg2:C1C2C3C4C5C6       |      |       |          |     |                |

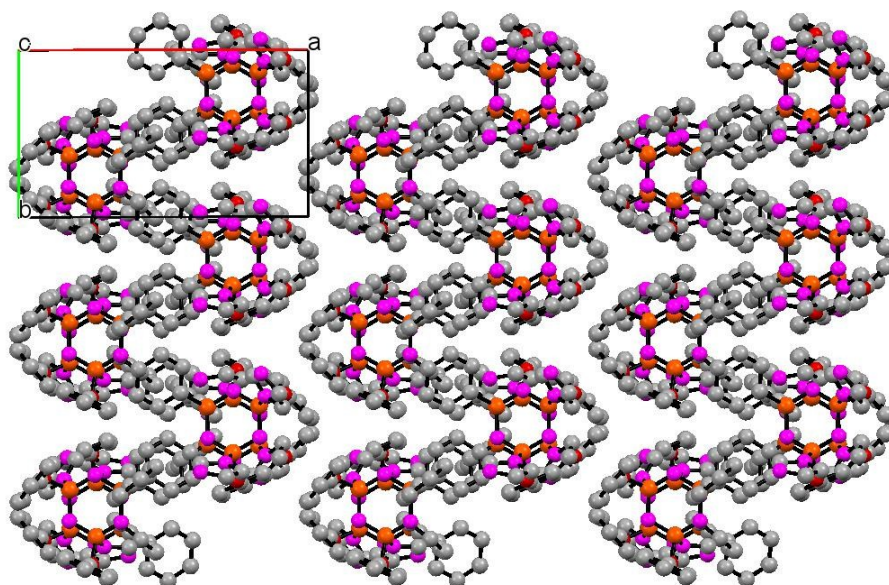

Fig. S18 View of crystal packing of compound 3a.

Table S2. Selected inter-molecular interactions for compound 3a

| D-H...A                             | D-H  | H...A | D...A    | DHA | Symmetry code  |
|-------------------------------------|------|-------|----------|-----|----------------|
| C15-H15...Cg1 <sup>1</sup>          | 0.95 | 2.76  | 3.700(7) | 169 | -x,1/2+y,1/2-z |
| C12-H12...Cg7 <sup>2</sup>          | 0.95 | 2.98  | 3.750(6) | 139 | x,y,z          |
| C18-H18...Cg7 <sup>2</sup>          | 0.95 | 2.92  | 3.686(6) | 139 | x,-1+y,z       |
| <sup>1</sup> Cg1:N4C19N5C20C21      |      |       |          |     |                |
| <sup>2</sup> Cg7:C22C23C24C25C26C27 |      |       |          |     |                |

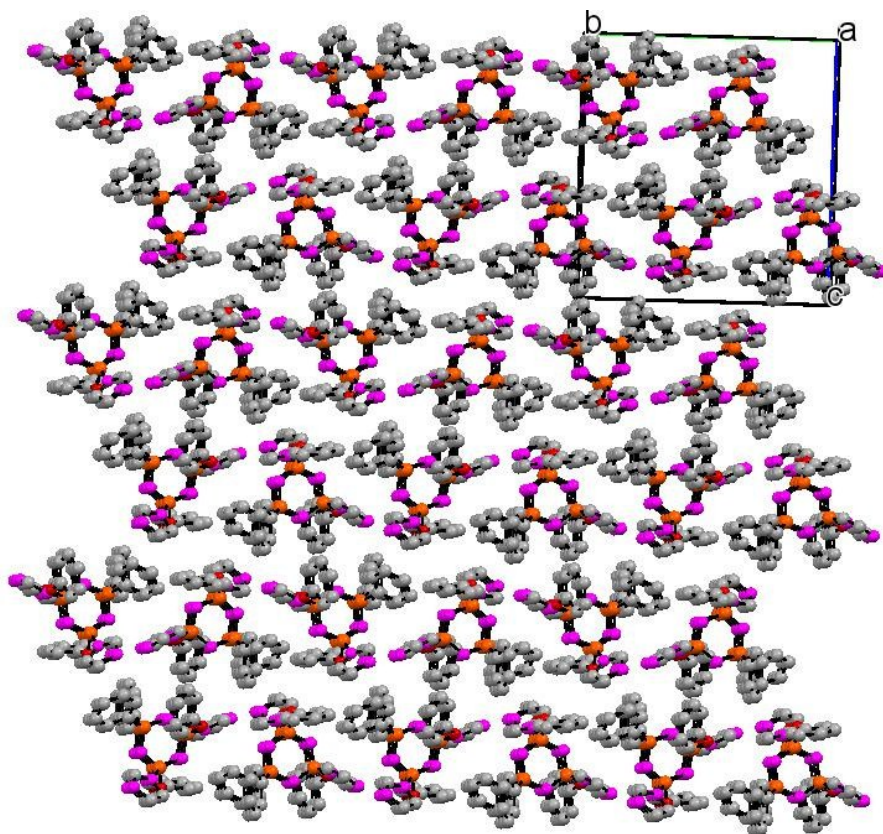

Fig. S19 View of crystal packing of compound 3b.

Table S3. Selected inter-molecular interactions for compound 3b

| D-H...A                             | D-H  | H...A | D...A    | DHA | Symmetry code       |
|-------------------------------------|------|-------|----------|-----|---------------------|
| C15-H15...Cg1 <sup>1</sup>          | 0.95 | 2.85  | 3.562(3) | 132 | x,y,z               |
| C24-H24...Cg4 <sup>2</sup>          | 0.95 | 2.76  | 3.625(2) | 151 | 3/2-x,1/2+y,1/2-z   |
| C29-H29...Cg5 <sup>3</sup>          | 0.95 | 2.73  | 3.490(4) | 137 | -1/2+x,1/2-y,-1/2+z |
| C21-H21...Cg7 <sup>4</sup>          | 0.95 | 2.98  | 3.698(2) | 134 | x,y,z               |
| <sup>1</sup> Cg1:N4C19N5C20C21      |      |       |          |     |                     |
| <sup>2</sup> Cg4:C1C2C3C4C5C6       |      |       |          |     |                     |
| <sup>3</sup> Cg5:C7C8C9C10C11C12    |      |       |          |     |                     |
| <sup>4</sup> Cg7:C22C23C24C25C26C27 |      |       |          |     |                     |

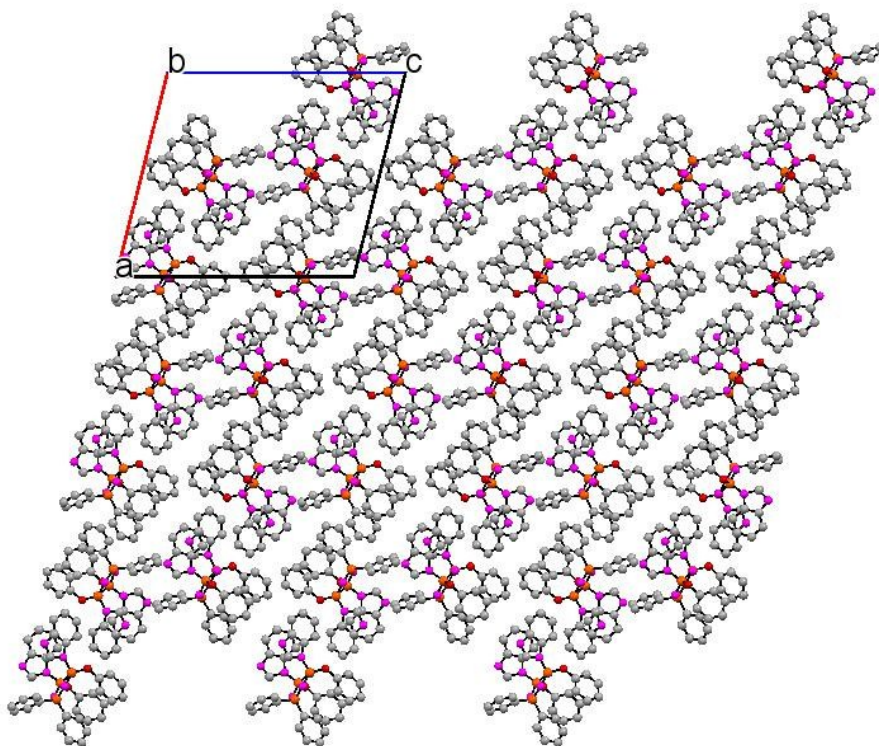

**Fig. S20** View of crystal packing of compound **4a**.

**Table S4.** Selected inter-molecular interactions for compound **4a**

| <b>D-H...A</b>                      | <b>D-H</b> | <b>H...A</b> | <b>D...A</b> | <b>DHA</b> | <b>Symmetry code</b> |
|-------------------------------------|------------|--------------|--------------|------------|----------------------|
| C2-H2...Cg7 <sup>1</sup>            | 0.95       | 2.90         | 3.677(4)     | 140        | x,y,z                |
| <sup>1</sup> Cg7:C20C21C22C23C24C25 |            |              |              |            |                      |

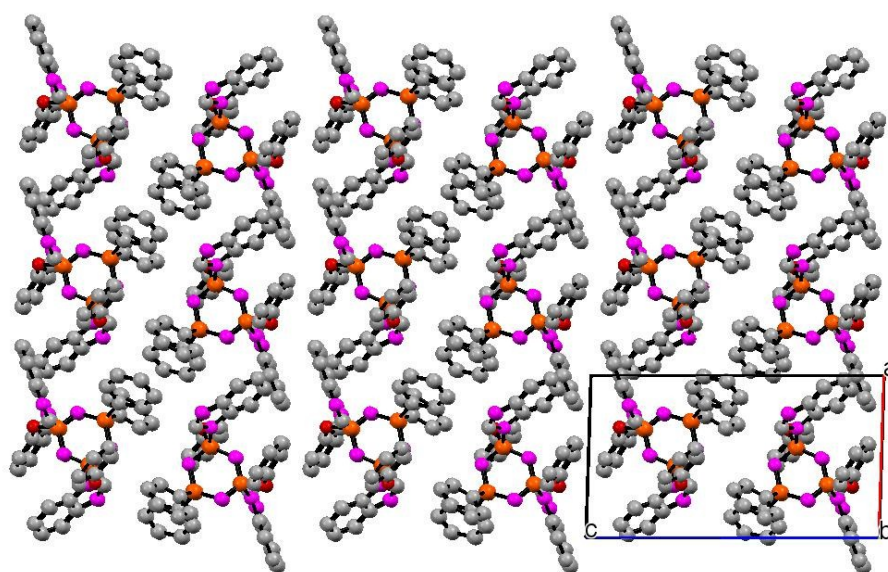

Fig. S21 View of crystal packing of compound **4b**.

Table S5. Selected inter-molecular interactions for compound **4b**

| D-H...A                             | D-H  | H...A | D...A    | DHA | Symmetry code |
|-------------------------------------|------|-------|----------|-----|---------------|
| C4-H4...Cg5 <sup>1</sup>            | 0.95 | 2.55  | 3.383(2) | 146 | 2-x,1-y,1-z   |
| C30-H30...Cg6 <sup>4</sup>          | 0.95 | 2.75  | 3.547(2) | 143 | 1-x,1-y,2-z   |
| C16-H16...Cg7 <sup>3</sup>          | 0.95 | 2.79  | 3.571(2) | 140 | 2-x,1-y,2-z   |
| C13-H13...Cg9 <sup>2</sup>          | 0.95 | 2.96  | 3.806(2) | 150 | x,y,z         |
| <sup>1</sup> Cg5:C7C8C9C10C11C12    |      |       |          |     |               |
| <sup>2</sup> Cg6:C14C15C16C17C18C19 |      |       |          |     |               |
| <sup>3</sup> Cg7:C20C21C22C23C24C25 |      |       |          |     |               |
| <sup>4</sup> Cg9:C33C34C35C36C37C38 |      |       |          |     |               |

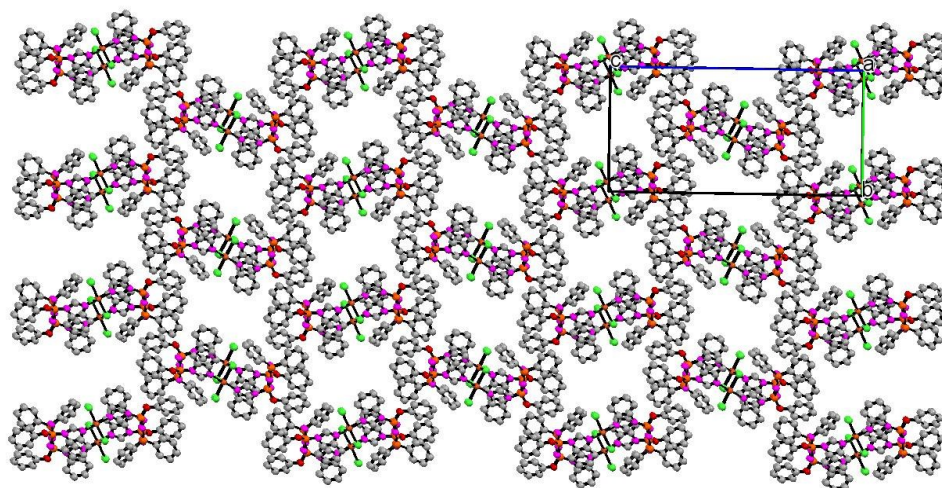

**Fig. S22** View of crystal packing of compound **5**.

**Table S6.** Selected inter-molecular interactions for compound **5**

| D-H...A                                                                                                                                                                                                                     | D-H  | H...A | D...A    | Dihedral angle | DHA | Symmetry code |
|-----------------------------------------------------------------------------------------------------------------------------------------------------------------------------------------------------------------------------|------|-------|----------|----------------|-----|---------------|
| Cg2 <sup>1</sup> ... Cg3 <sup>2</sup>                                                                                                                                                                                       |      |       | 3.746(3) | 6.8(3)         |     | x,y,z         |
| Cg2 <sup>1</sup> ... Cg4 <sup>3</sup>                                                                                                                                                                                       |      |       | 3.746(3) | 6.8(3)         |     | 1-x,-y,-z     |
| Cg3 <sup>2</sup> ... Cg8 <sup>4</sup>                                                                                                                                                                                       |      |       | 4.420(3) | 6.2(3)         |     | x,y,z         |
| Cg8 <sup>4</sup> ... Cg10 <sup>5</sup>                                                                                                                                                                                      |      |       | 3.932(3) | 4.7(2)         |     | 1-x,-y,-z     |
| C3-H3...Cg3 <sup>2</sup>                                                                                                                                                                                                    | 0.95 | 2.92  | 3.643(6) |                | 134 | 1+x,y,z       |
| C3-H3...Cg4 <sup>3</sup>                                                                                                                                                                                                    | 0.95 | 2.92  | 3.643(6) |                | 134 | 2-x,-y,-z     |
| <sup>1</sup> Cg2:N4C13N5C14C19<br><sup>2</sup> Cg3:N6C32C27#N7#C26#<br><sup>3</sup> Cg4:N7C26N6#C32#C27<br><sup>4</sup> Cg8:C14C15C16C17C18C19<br><sup>5</sup> Cg10:C27C28C29C30C31#C32#<br>symmetry code (#): -x+1, -y, -z |      |       |          |                |     |               |

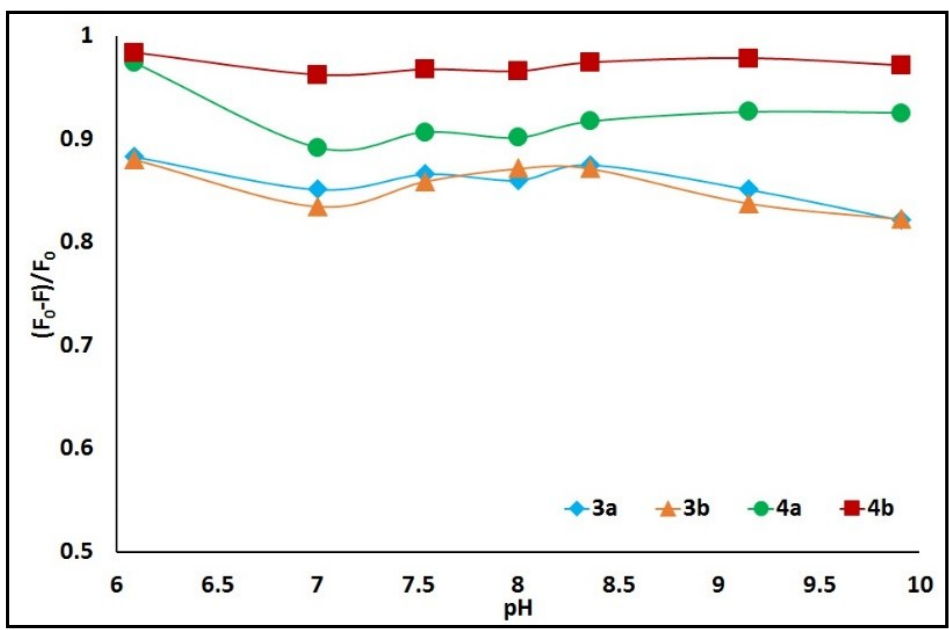

Fig. S23

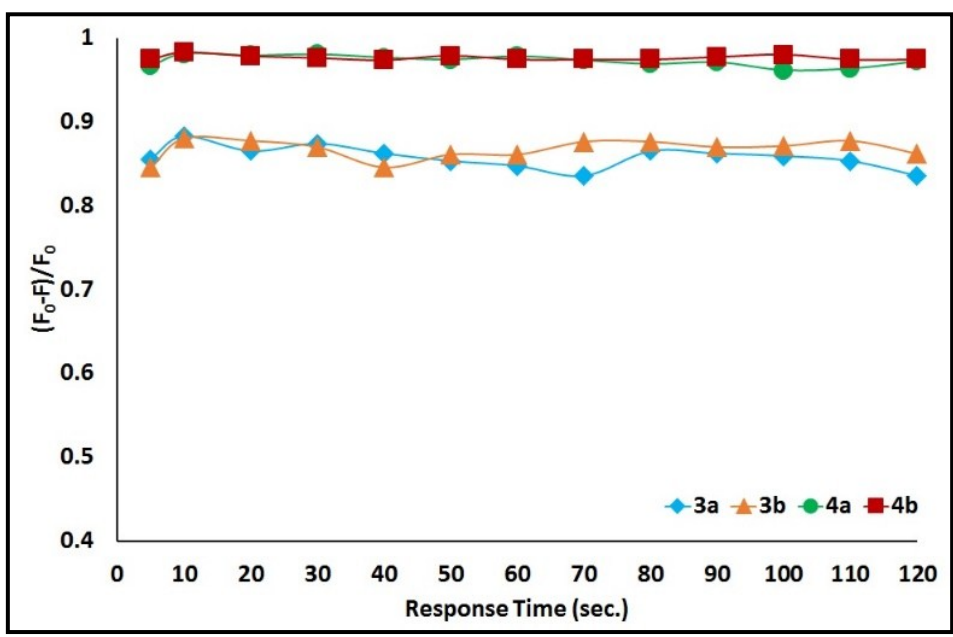

Fig. S24



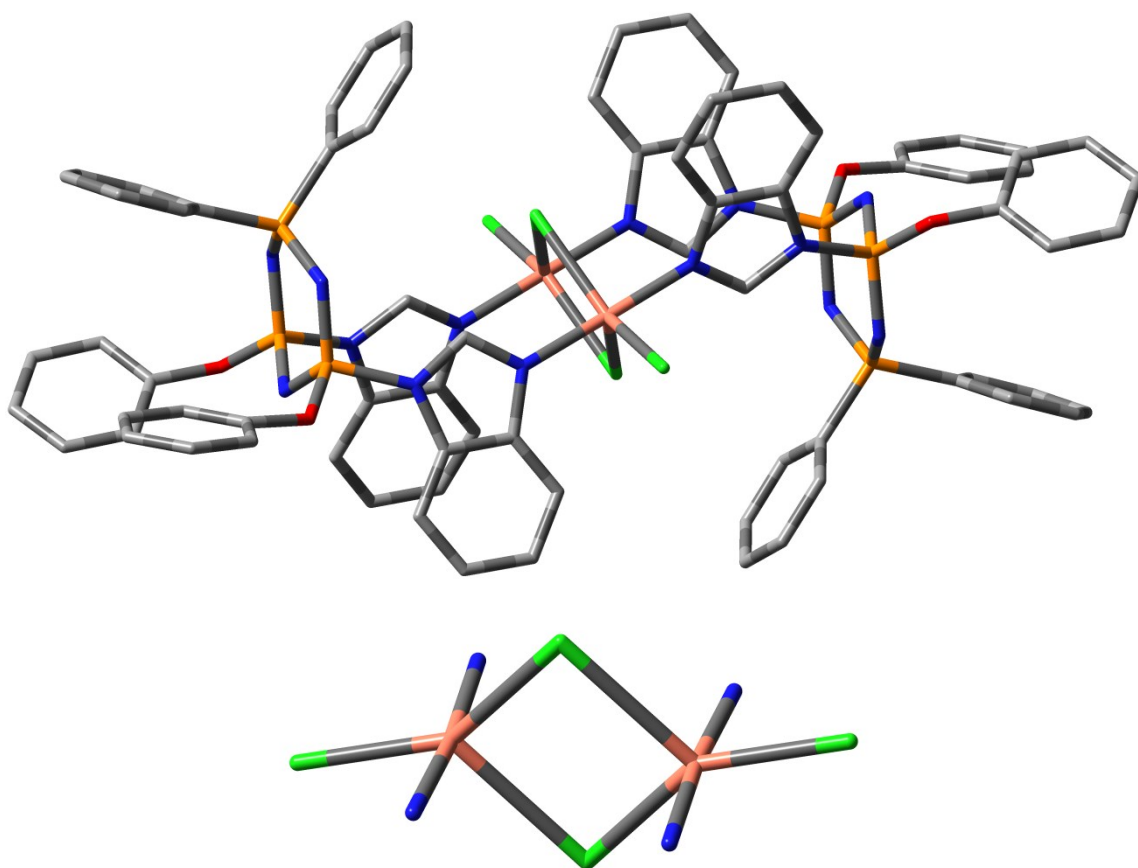

**Figure S25.** Optimized structure of compound 5

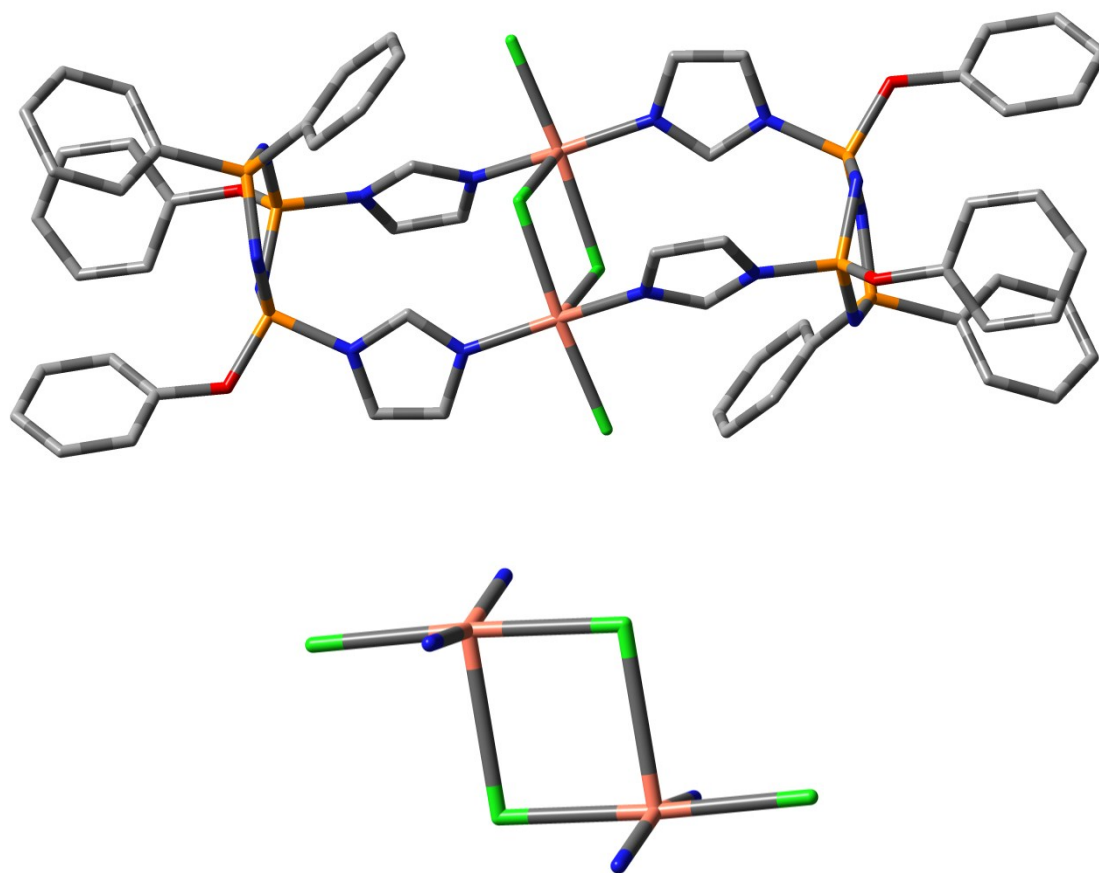

**Figure S26.** Optimized structure of compound **3a** with Cu(II).

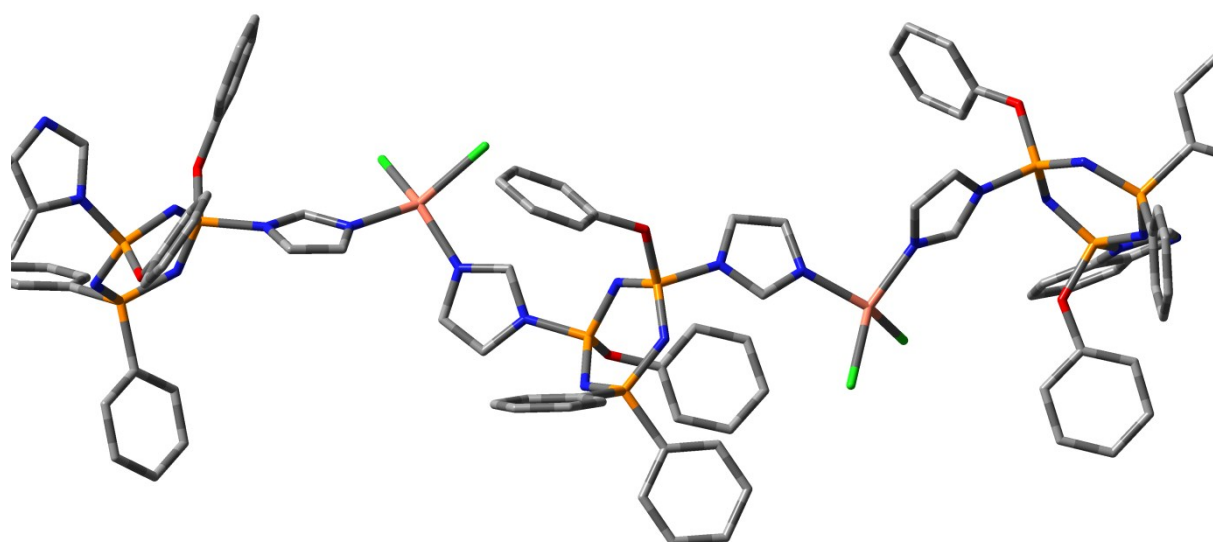

**Figure S27.** Optimized structure of compound **3b** with Cu(II).

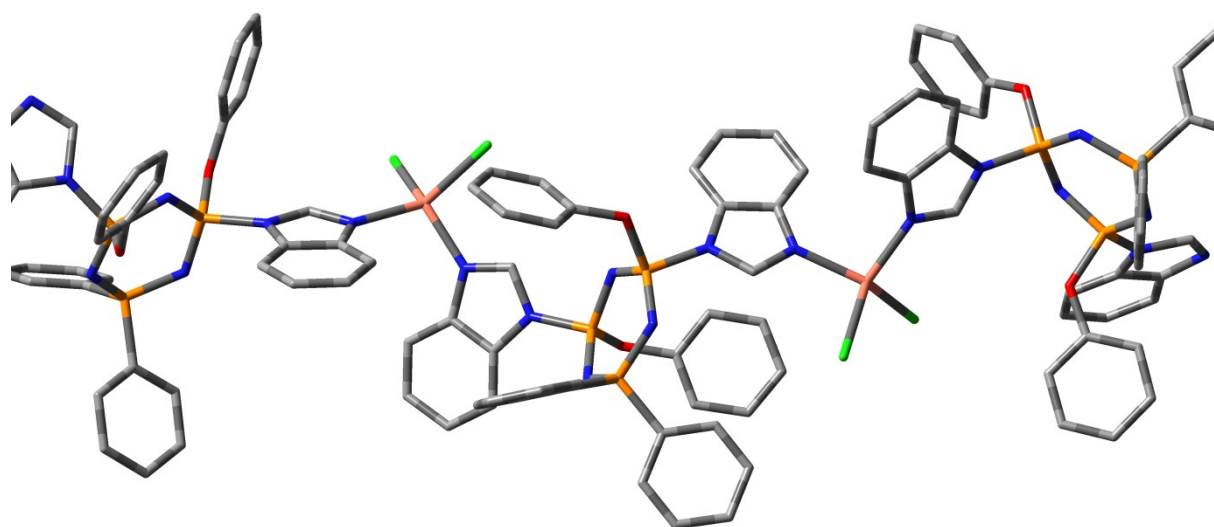

**Figure S28.** Optimized structure of compound **4b** with Cu(II).

**Table S7.** The data obtained from DFT calculations.

|                          |                 | B3LYP/LanL2DZ | Experimental |
|--------------------------|-----------------|---------------|--------------|
| <b>5</b>                 | <b>Cu1-N5</b>   | 1.977         | 1.990(4)     |
|                          | <b>Cu1-N7</b>   | 1.980         | 2.004(4)     |
|                          | <b>Cu1-Cl1</b>  | 2.418         | 2.3037(14)   |
|                          | <b>Cu1-Cl2</b>  | 2.593         | 2.3102(12)   |
|                          | <b>Cu1-Cl2#</b> | 2.723         | 2.6426(14)   |
|                          | <b>Cu1-Cu1#</b> | 3.686         | 3.5187(9)    |
| <b>3a</b><br>with Cu(II) | <b>Cu1-N5</b>   | 2.006         |              |
|                          | <b>Cu1-N7</b>   | 1.993         |              |
|                          | <b>Cu1-Cl1</b>  | 2.430         |              |
|                          | <b>Cu1-Cl2</b>  | 2.495         |              |
|                          | <b>Cu1-Cl2#</b> | 2.868         |              |
|                          | <b>Cu1-Cu1#</b> | 3.941         |              |
| <b>3b</b><br>with Cu(II) | <b>Cu-N1</b>    | 2.034         |              |
|                          | <b>Cu-N2</b>    | 2.056         |              |
|                          | <b>Cu-Cl1</b>   | 2.335         |              |
|                          | <b>Cu-Cl2</b>   | 2.313         |              |
| <b>4b</b><br>with Cu(II) | <b>Cu-N1</b>    | 2.040         |              |
|                          | <b>Cu-N2</b>    | 2.064         |              |
|                          | <b>Cu-Cl1</b>   | 2.313         |              |
|                          | <b>Cu-Cl2</b>   | 2.338         |              |

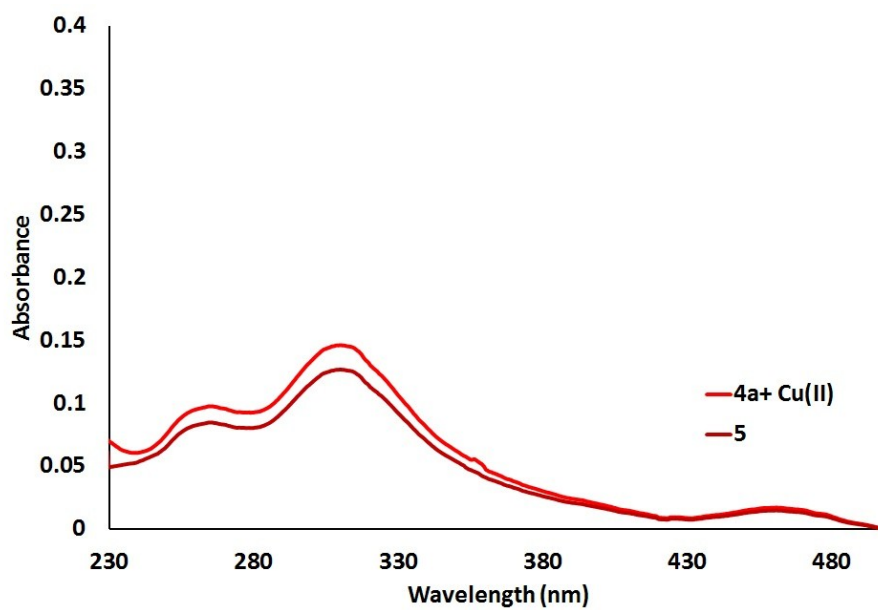

**Figure S29.** Absorption spectra of 10  $\mu\text{M}$  compound **4a** + 1 eqv.  $\text{Cu}^{2+}$  and compound **5** in ACN.
